# Supplementary material
Source: PubMed Central journal article supplement (PMC2425677)

Figure S1

*Ptf1a*<sup>YFP/+</sup>

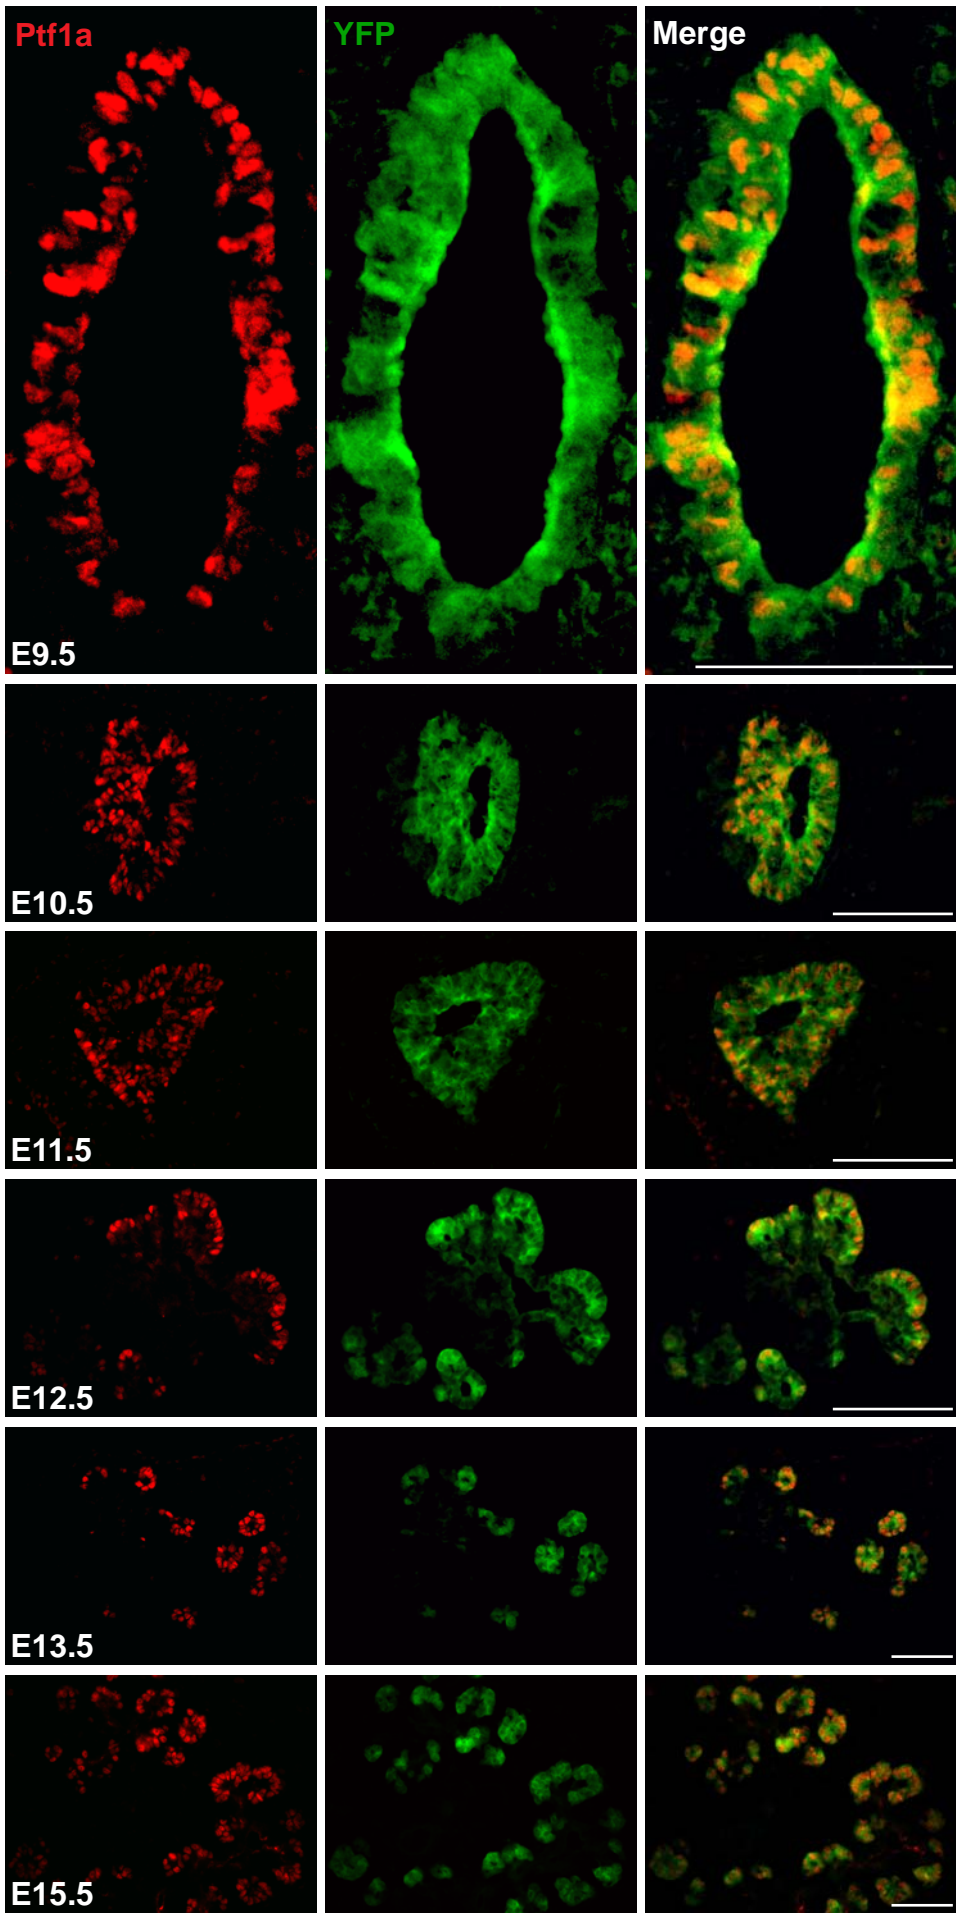

Supplement: NIHMS45967-supplement-01.pdf [file NIHMS45967-supplement-01.pdf]

Figure S2

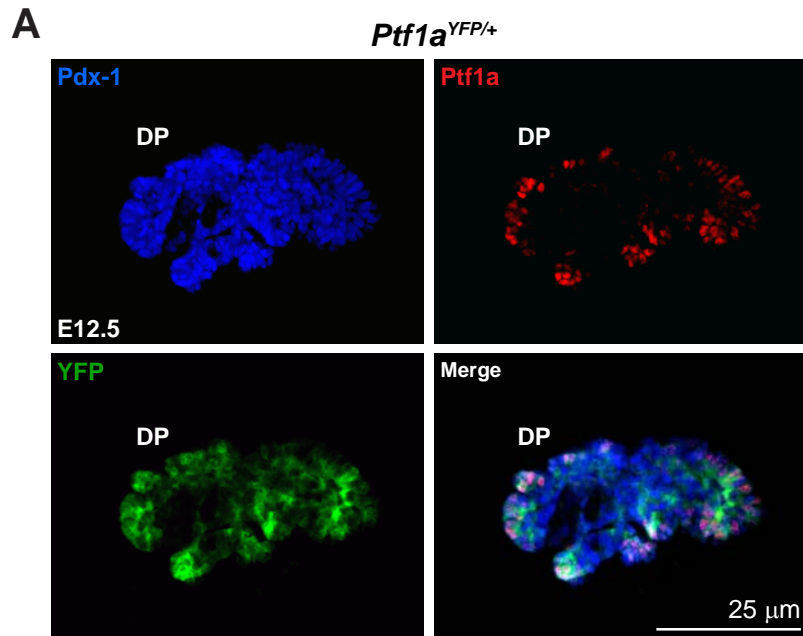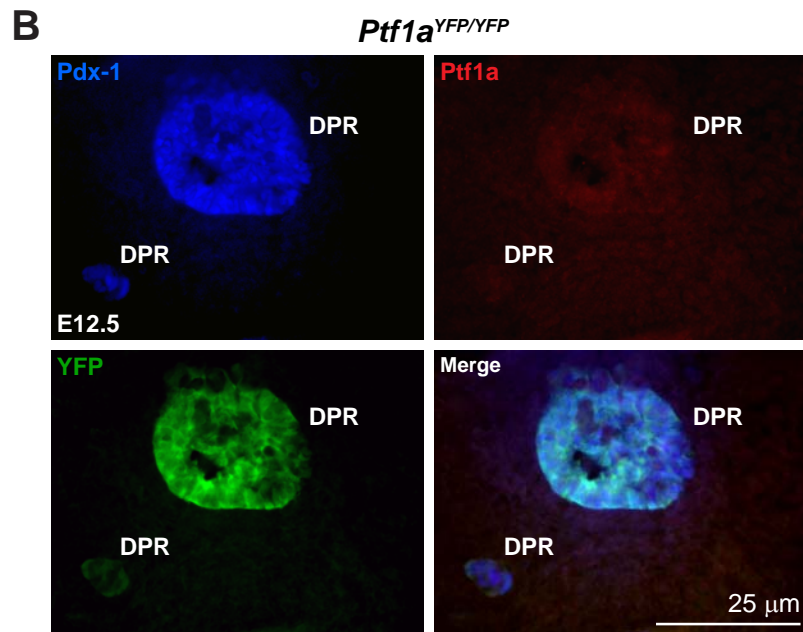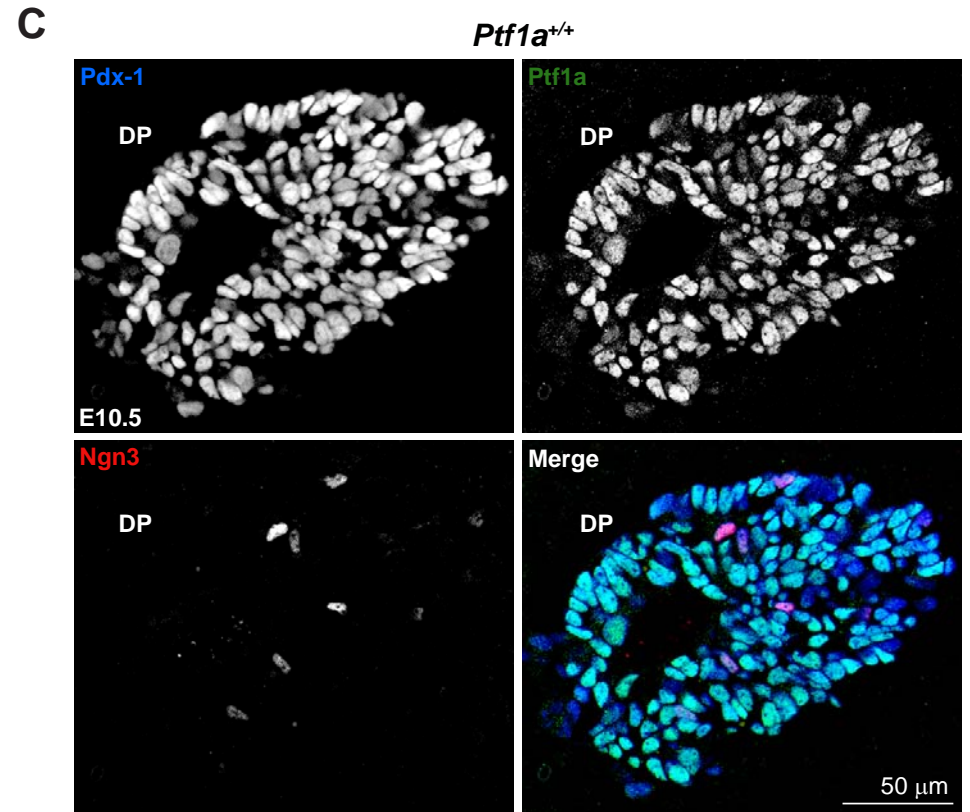

Supplement: NIHMS45967-supplement-02.pdf [file NIHMS45967-supplement-02.pdf]

Figure S3

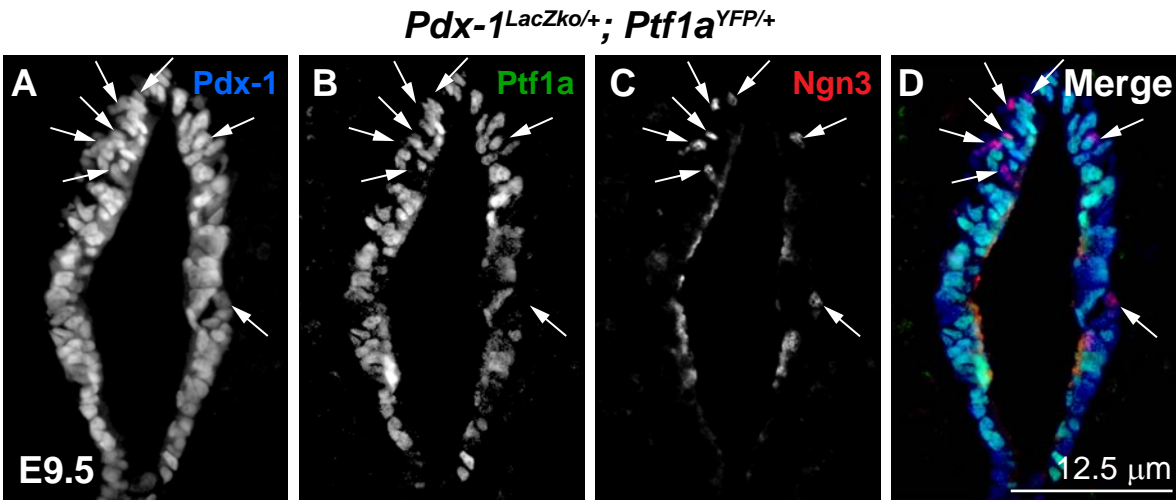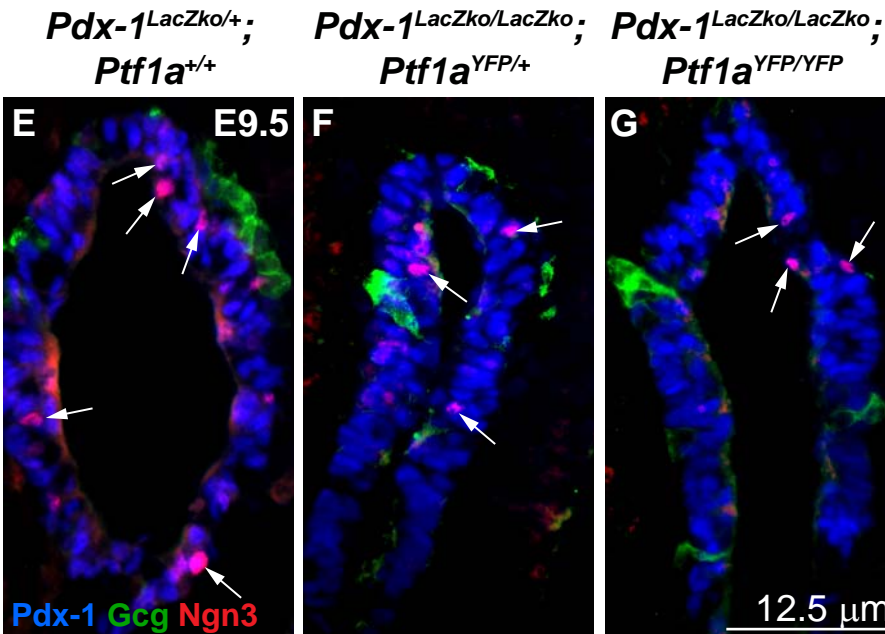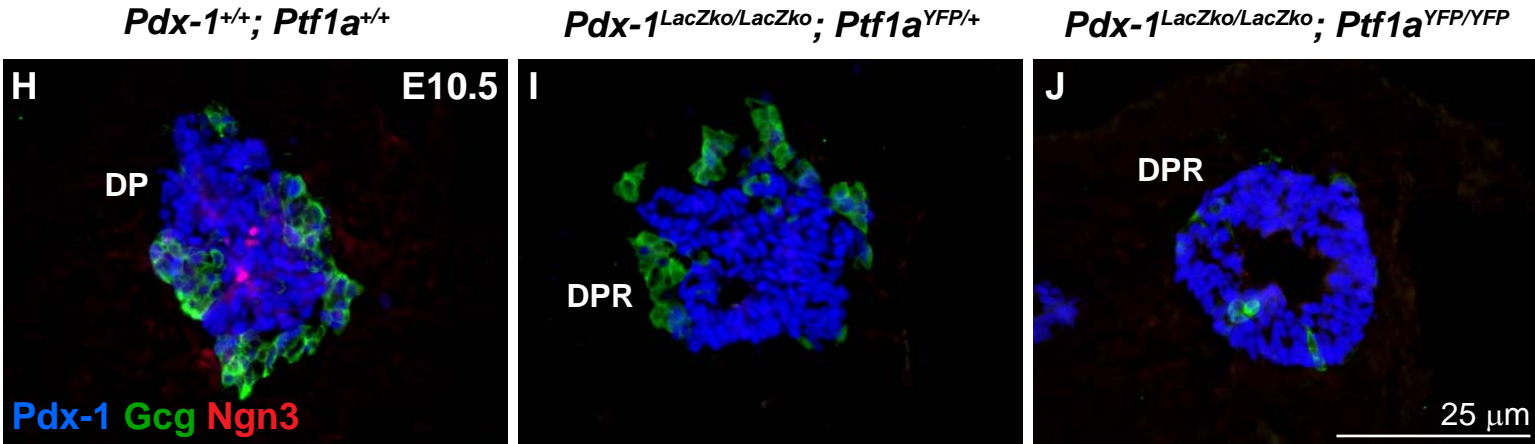

Supplement: NIHMS45967-supplement-03.pdf [file NIHMS45967-supplement-03.pdf]

***Pdx-1*<sup>LacZko/LacZko</sup>; *Ptf1a*<sup>YFP/+</sup>**

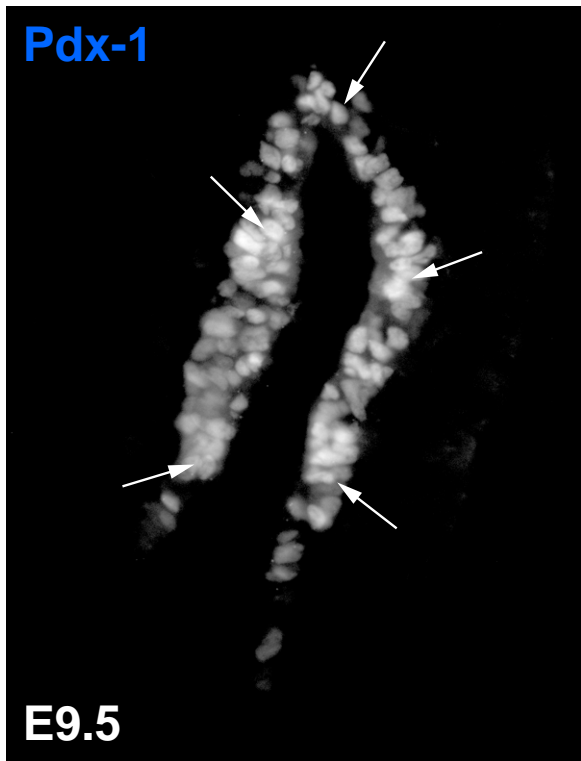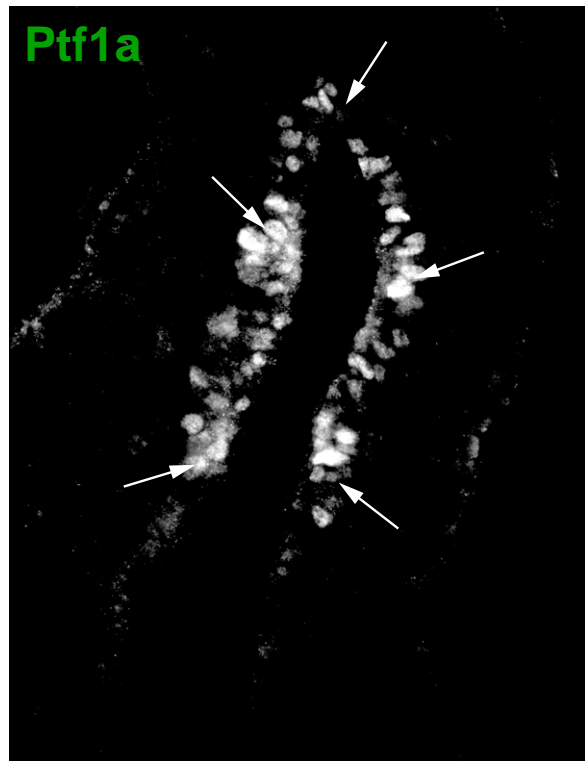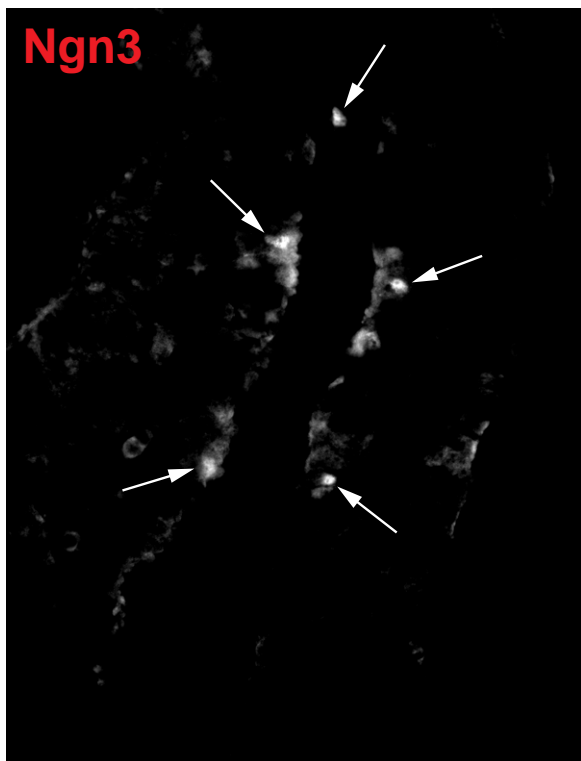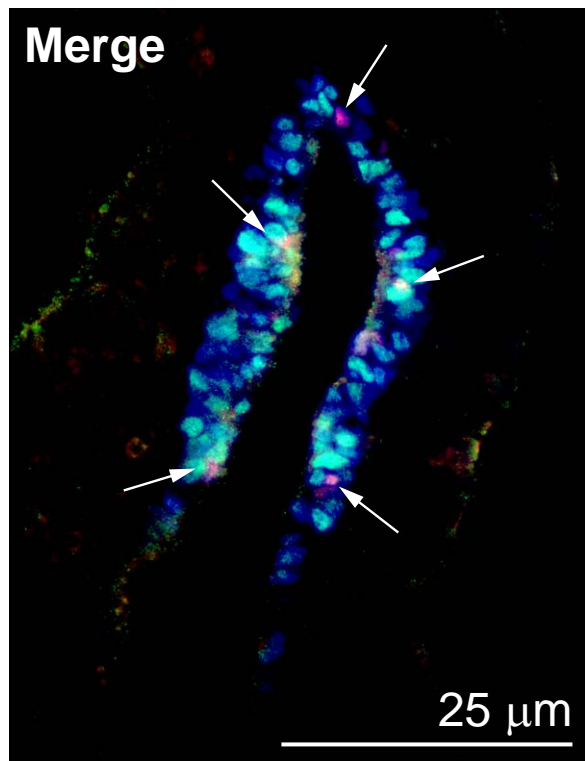

Supplement: NIHMS45967-supplement-04.pdf [file NIHMS45967-supplement-04.pdf]
